# Supplementary material for: Polaron-assisted electronic transport in ZnP2 nanowires
Source: Royal Society of Chemistry journal article supplement (doi:10.1039/d2tc05478g), 2023-01-01
Supplement: d2tc05478g1.pdf [file d2tc05478g1.pdf]

## Supplemental Material for: “Polaron-assisted electronic transport in ZnP<sub>2</sub> nanowires”

F. M. de Oliveira,<sup>1</sup> L. Cabral,<sup>2</sup> L. Villegas-Lelovsky,<sup>3,1</sup> Matheus P. Lima,<sup>1</sup>  
F. F. H. Aragón,<sup>4</sup> G. E. Marques,<sup>1</sup> A. J. Chiquito,<sup>1</sup> and M. D. Teodoro<sup>1,\*</sup>

<sup>1</sup>Physics Department, Federal University of São Carlos, CEP 13565-905, São Carlos, SP, Brazil.

<sup>2</sup>Institute of Physics “Gleb Wataghin” (IFGW), State University of Campinas, CEP 13083-859, Campinas, SP, Brazil.

<sup>3</sup>Physics Department, IGCE, Paulista State University, CEP 13506-900, Rio Claro, SP, Brazil.

<sup>4</sup>Universidad Nacional de San Agustín de Arequipa, Av. Independencia s/n, Arequipa, Peru.

### S1. DENSITY FUNCTIONAL THEORY RESULTS

The spin-unpolarized local density of states (LDOS) for the pristine ZnP<sub>2</sub> in the monoclinic geometry is depicted in the Figure S1. In Figure S2 we show the effect of Hubbard correction on P-P and Zn-d states. Figure S3 represents the charged  $1V_{Zn}1P_i$ -I calculations.

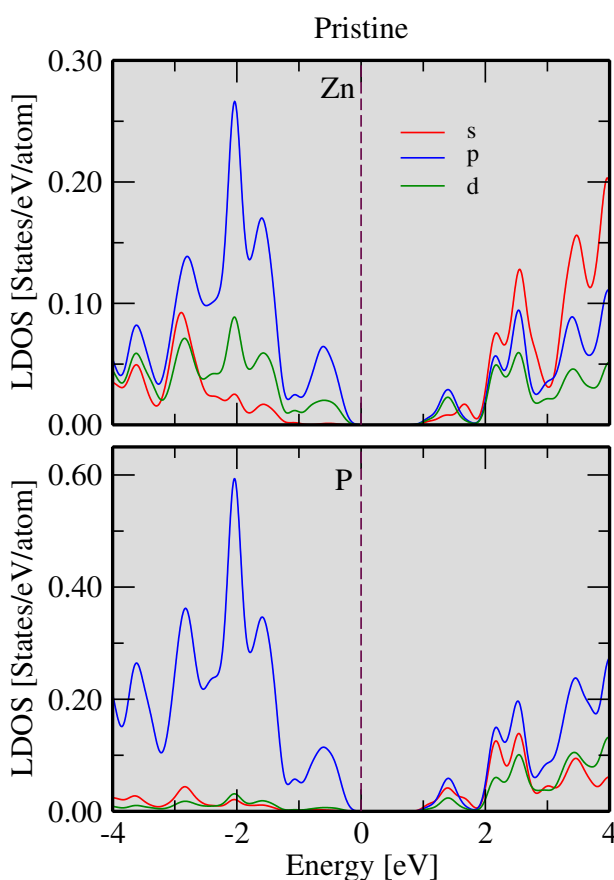

Figure S1. Calculated density of states for the pristine ZnP<sub>2</sub> using HSE06 XC. In upper panel is shown the Zn calculation, while the bottom part represent the P states investigation.

\* mdaldin@df.ufscar.br

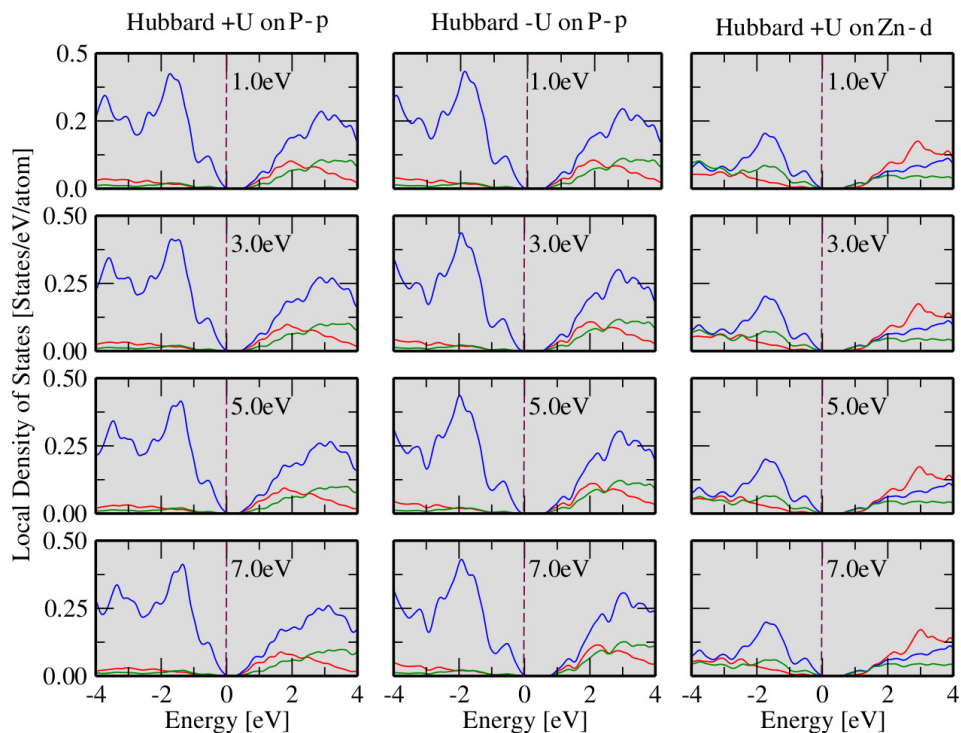

Figure S2. Calculated density of states using PBE Hubbard correction on P-*p* and Zn-*d* states.

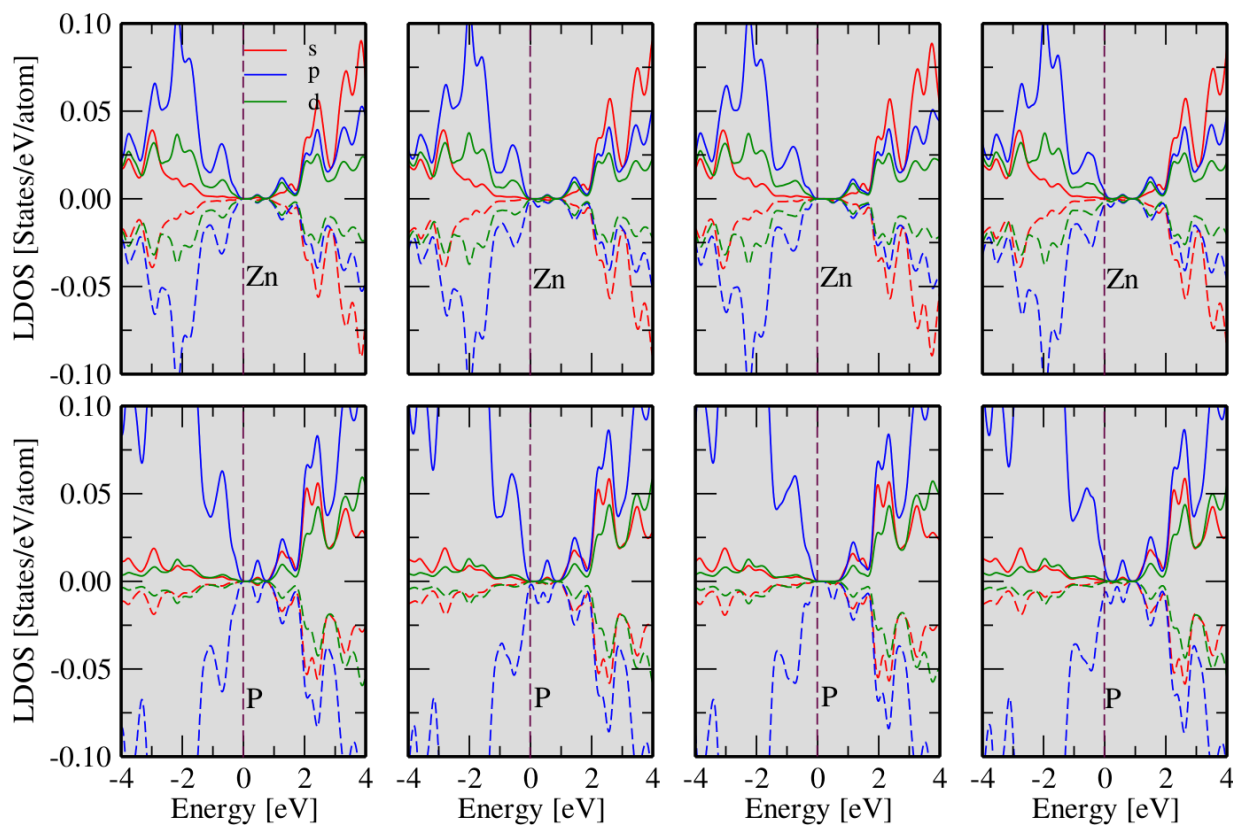

Figure S3. Calculated local density of states for the structure  $1V_{Zn}1P_I-I$ . From left to right panel columns, we have optimized the system with different charges  $q = -1, +1, -2$  and  $+2$ , respectively. The upper and bottom panels show the zinc and phosphor local density of states, respectively.

## S2. OPTIMIZED STRUCTURES

This section presents the lattice parameters and atomic positions of structures optimized with HSE06 XC.

A.  $1V_{Zn}1P_i-I$ 

SYSTEM = ZnP2

1.0000000000000000

17.6369807634095999 0.0000000000000000 -0.0504105781290306  
 0.0000000000000000 14.6753022059525247 0.0000000000000000  
 -3.2408554168070340 0.0000000000000000 14.8647166764882588

Zn P

63 128

Direct

0.1972706152132154 0.0476302361951876 0.1106909501739330  
 0.6957363092434580 0.0476646519952493 0.1120378083134670  
 0.1969914349991735 0.5474669590703487 0.1119716859974273  
 0.6958671203862585 0.5478159908187072 0.1120831453283892  
 0.1973383088576029 0.0475169899505704 0.6145293052901515  
 0.6959613178048603 0.0475783851040943 0.6124561854952144  
 0.1969968956530646 0.5474440672873008 0.6129750312843600  
 0.6961988776601659 0.5479269997777603 0.6122336864727254  
 0.3040295703464030 0.4524532854972400 0.3877610824918953  
 0.8032596256843508 0.4527881613531490 0.3874398565686770  
 0.3045355570441867 0.9518815401218096 0.3880632393206334  
 0.8029189089873948 0.9518676392876695 0.3876231286148041  
 0.3031449426469465 0.4447826221170452 0.8876257010687032  
 0.8034263177354762 0.4528121574694925 0.8872948931739024  
 0.3001868600916991 0.9521421697236179 0.8869085547309975  
 0.8030492271937056 0.9519638804676687 0.8874665731413260  
 0.3050961953641455 0.2970606010319151 0.1355399047511522  
 0.8027274930850344 0.2981550030519491 0.1376195144923026  
 0.3038746388657253 0.7976127209930969 0.1372825037088934  
 0.8033422863258923 0.7973162632847771 0.1374941416278688  
 0.3050875279940419 0.2970083983948196 0.6407674399184834  
 0.8030878026615182 0.2980940946557574 0.6380283404300735  
 0.3038877728834426 0.7975969035266386 0.6381494426736007  
 0.8036119675079415 0.7973984143533326 0.6376987564825943  
 0.1974576783747413 0.2017656348408065 0.3626110495038914  
 0.6958640896663572 0.2021797284955210 0.3620725123311849  
 0.1964980244970762 0.7022277510468994 0.3623466723890357  
 0.6960940093334197 0.7025156430283317 0.3622267552346555  
 0.6956911720285267 0.2023762802619302 0.8623455716156732  
 0.1970992511348997 0.7016976687118313 0.8625186872637233  
 0.6960804640030984 0.7025615135096678 0.8622660552696749  
 0.0407645489025047 0.3739974688864113 0.1974172274433116  
 0.5407466975100427 0.3736304772389799 0.1968199013359647  
 0.0406755383344316 0.8720456216725863 0.1967414274421992  
 0.5406231185785219 0.8730943018685365 0.1967739440399542  
 0.0416228271285423 0.3733170517931391 0.6974007740683394  
 0.5407198860350823 0.3736207469868602 0.6974477239285726  
 0.0413471260209537 0.8729631874083266 0.6970366515615573  
 0.5407085772808907 0.8731540663107747 0.6973062928044239  
 0.4592209400583261 0.1270196443883055 0.3026937958676451  
 0.9569392482808552 0.1256374143279055 0.3018176871278586  
 0.4591862848356973 0.6267030400518711 0.3028621859338665  
 0.9593101137101027 0.6270598332816949 0.3029804620015197

|                    |                    |                    |
|--------------------|--------------------|--------------------|
| 0.4574221269684334 | 0.1286128472355594 | 0.8029460710611439 |
| 0.9582749066549311 | 0.1258476842157053 | 0.8021862468351575 |
| 0.4589493681400177 | 0.6264406974192084 | 0.8029070974894108 |
| 0.9594324218393607 | 0.6270441908063216 | 0.8030201080305790 |
| 0.4573058286097224 | 0.1251261054663776 | 0.0519647244321925 |
| 0.9566306595783469 | 0.1241079394085772 | 0.0508617557449987 |
| 0.4589959365274158 | 0.6227618962537671 | 0.0528758861496653 |
| 0.9593164329527933 | 0.6231585978316173 | 0.0527176288635638 |
| 0.4592336948476600 | 0.1233886239032131 | 0.5532284568651066 |
| 0.9568854308133647 | 0.1240817962961595 | 0.5532374332023821 |
| 0.4592616641040874 | 0.6229170031751862 | 0.5531112529069061 |
| 0.9594004577968470 | 0.6232736068262981 | 0.5532655486557235 |
| 0.0410621712797031 | 0.3778991657461746 | 0.4469527512643987 |
| 0.5407216614140824 | 0.3769314488308543 | 0.4470956852867166 |
| 0.0405893881666206 | 0.8762273699669294 | 0.4472489286363871 |
| 0.5407279650329152 | 0.8767443317734392 | 0.4470371381643407 |
| 0.0417710992586953 | 0.3772774171294988 | 0.9473690547483498 |
| 0.5401452444286061 | 0.3775500302881235 | 0.9468901716550242 |
| 0.0413189823172523 | 0.8772850539081383 | 0.9473282408390944 |
| 0.5406251812204610 | 0.8768919376475486 | 0.9470297769440088 |
| 0.1195795647471932 | 0.2406293002927141 | 0.2134585867128667 |
| 0.6207353491260933 | 0.2409699084762237 | 0.2128781498516850 |
| 0.1212530702225142 | 0.7405957068735566 | 0.2128433779920483 |
| 0.6210157047517766 | 0.7410208339630149 | 0.2129775384928884 |
| 0.1199708269617149 | 0.2411998853653015 | 0.7092373108098019 |
| 0.6207668682119282 | 0.2410806360677803 | 0.7128072675127041 |
| 0.1212514918293411 | 0.7407053612572344 | 0.7131065597417002 |
| 0.6210931516670708 | 0.7410841589296328 | 0.7128205318973534 |
| 0.3791276675280478 | 0.2590819544152079 | 0.2865946815915265 |
| 0.8792098335829196 | 0.2595363537854262 | 0.2874269793669181 |
| 0.3789688520640477 | 0.7589701594038449 | 0.2869859921620362 |
| 0.8787776686637888 | 0.7589928286573360 | 0.2869743886438655 |
| 0.3783073071258893 | 0.2604271520020514 | 0.7901481605388847 |
| 0.8796029887545995 | 0.2593985904572413 | 0.7875137347538476 |
| 0.3792808856406630 | 0.7590047684278770 | 0.7873100034129971 |
| 0.8788995874594884 | 0.7590110507610078 | 0.7870985520808952 |
| 0.3789551216233037 | 0.4910369201566782 | 0.0365678548193209 |
| 0.8787661743679412 | 0.4910186671940135 | 0.0370467331846108 |
| 0.3788533886229005 | 0.9910373103419909 | 0.0362445481586037 |
| 0.8786541210278224 | 0.9903628684782958 | 0.0369653327793540 |
| 0.3789709008888258 | 0.4908915499293636 | 0.5371499436909255 |
| 0.8788269666380460 | 0.4911347734716347 | 0.5368177858145405 |
| 0.3792840587222057 | 0.9909688323427011 | 0.5372281310347476 |
| 0.8787551306201613 | 0.9905170991031265 | 0.5373441346148177 |
| 0.1209245706195867 | 0.0088978886856538 | 0.4631185307604280 |
| 0.6209511846555033 | 0.0089971710925083 | 0.4629068519277549 |
| 0.1213922747891924 | 0.5093790155187697 | 0.4631484868847774 |
| 0.6210595338309159 | 0.5091477933232368 | 0.4630259890974440 |
| 0.1224822746915128 | 0.0082412499506421 | 0.9605680894900119 |
| 0.6207298276609257 | 0.0092029868186600 | 0.9627906522380908 |
| 0.1216013636017233 | 0.5093178955001411 | 0.9626854481428061 |
| 0.6211965631110390 | 0.5091728724390265 | 0.9628034081957849 |
| 0.1870866800754787 | 0.2125809837992649 | 0.1082991441270388 |
| 0.6865018108037192 | 0.2124020310863614 | 0.1079422891272847 |
| 0.1868210315339970 | 0.7124088877089161 | 0.1077959349609105 |
| 0.6865857672088683 | 0.7125256310764487 | 0.1079882914340414 |
| 0.1871658432670504 | 0.2123919624995962 | 0.6085718616907376 |
| 0.6867346232431680 | 0.2123273000015928 | 0.6081304408256700 |

|                    |                    |                    |
|--------------------|--------------------|--------------------|
| 0.1868266415495167 | 0.7123877958501020 | 0.6081442432468933 |
| 0.6867420679503490 | 0.7126563703779623 | 0.6078944073583447 |
| 0.3136917664651678 | 0.2874786442527461 | 0.3919639802495645 |
| 0.8129354870165204 | 0.2875712934992004 | 0.3918724721398083 |
| 0.3134659337797646 | 0.7872475484841669 | 0.3920815406612746 |
| 0.8131995131118273 | 0.7873413255226049 | 0.3919397920211153 |
| 0.3065987311514035 | 0.2813495645571051 | 0.8905523456605201 |
| 0.8128753565849287 | 0.2876729223925477 | 0.8915673756673327 |
| 0.3136117524969240 | 0.7874827454905030 | 0.8921297490492164 |
| 0.8131773128991978 | 0.7874383602446522 | 0.8919452888533402 |
| 0.3137244658184677 | 0.4623581733859677 | 0.1418109041920498 |
| 0.8129220310370262 | 0.4627609673691760 | 0.1418339776442396 |
| 0.3137630743223032 | 0.9623695674821454 | 0.1415917723462279 |
| 0.8127089307934349 | 0.9623334359264196 | 0.1417798781546344 |
| 0.3137345460660993 | 0.4623553497343030 | 0.6424259595311139 |
| 0.8132286243474830 | 0.4626902975009928 | 0.6417894029133683 |
| 0.3138211714558449 | 0.9623249822079535 | 0.6423552378458126 |
| 0.8130013465940589 | 0.9623698191142471 | 0.6421143925741476 |
| 0.1871918689291148 | 0.0366596310538857 | 0.3584969500441643 |
| 0.6865397162762574 | 0.0374781291308275 | 0.3578809930203508 |
| 0.1868010209904440 | 0.5373681693239414 | 0.3579579381142994 |
| 0.6867395211961509 | 0.5378712092847656 | 0.3582077582982246 |
| 0.1890362119594329 | 0.0440221944186098 | 0.8584890872525701 |
| 0.6866281800966459 | 0.0375802961471019 | 0.8580166910920014 |
| 0.1880026677253878 | 0.5369279593539407 | 0.8582705192679347 |
| 0.6868301602363723 | 0.5379197543360633 | 0.8579450333842499 |
| 0.0404297377563253 | 0.1263306460238107 | 0.1972493116632953 |
| 0.5386688642846750 | 0.1280121288753593 | 0.1970597805239100 |
| 0.0388903225925042 | 0.6279351596320417 | 0.1976570106044513 |
| 0.5390160593327766 | 0.6279945216122591 | 0.1977414036268035 |
| 0.0430725827845571 | 0.1266595271506593 | 0.6987920114935072 |
| 0.5386900961734619 | 0.1281628983644521 | 0.6983305887855297 |
| 0.0391541456378029 | 0.6278290077567857 | 0.6979100379809540 |
| 0.5391159532115957 | 0.6280531869808272 | 0.6978721492025758 |
| 0.4611028142036953 | 0.3720625584285073 | 0.3023171806971384 |
| 0.9607474005821305 | 0.3729442187249167 | 0.3023850727594777 |
| 0.4610073349972681 | 0.8720069349857409 | 0.3022017650528555 |
| 0.9611359310928500 | 0.8717087373218600 | 0.3022103965126579 |
| 0.4612595681504086 | 0.3724584138060448 | 0.8021515851038306 |
| 0.9612900846951391 | 0.3727874050131894 | 0.8024365865600274 |
| 0.4609627607712330 | 0.8723697730404141 | 0.8022753299626291 |
| 0.9613989766124624 | 0.8715525405204265 | 0.8023082479823074 |
| 0.4613729999209912 | 0.3785473851713189 | 0.0526050800036880 |
| 0.9610980393160203 | 0.3781238902176460 | 0.0523131081174328 |
| 0.4610225968268962 | 0.8782956059006027 | 0.0521782365650051 |
| 0.9610257651138553 | 0.8777542973535072 | 0.0520483560622087 |
| 0.4610336224905865 | 0.3778929040536971 | 0.5522504446694858 |
| 0.9611997045853822 | 0.3783697961706144 | 0.5523232883657347 |
| 0.4611540732933588 | 0.8778546058214129 | 0.5523166902500031 |
| 0.9610666007200166 | 0.8777476075953228 | 0.5525215725612114 |
| 0.0404135611691927 | 0.1233985866782744 | 0.4481751428260455 |
| 0.5390144842629734 | 0.1220436800831209 | 0.4478082110211868 |
| 0.0388990738885386 | 0.6219195046839129 | 0.4477943012656560 |
| 0.5389481265491578 | 0.6220668656121643 | 0.4477718843727865 |
| 0.0430093806934685 | 0.1241633307852339 | 0.9479395056341400 |
| 0.5386690617973668 | 0.1221198108500432 | 0.9477030091236888 |
| 0.0391369261209918 | 0.6218374488787114 | 0.9477098850153473 |
| 0.5390432094599507 | 0.6220354040758150 | 0.9477679088036406 |

|                    |                    |                    |
|--------------------|--------------------|--------------------|
| 0.1182606115060015 | 0.0091287279441761 | 0.2215330410076977 |
| 0.6170387233941412 | 0.0106231173844704 | 0.2211328117833108 |
| 0.1175970158384473 | 0.5107011336859646 | 0.2211621373517299 |
| 0.6175293415342401 | 0.5107071057260271 | 0.2215843190150672 |
| 0.1196329615224177 | 0.0079517466856818 | 0.7243384469918945 |
| 0.6170807425766091 | 0.0107715173973337 | 0.7213327067432331 |
| 0.1178626989419101 | 0.5105960432747476 | 0.7217793460672699 |
| 0.6176898736820465 | 0.5108143289394684 | 0.7211269888400752 |
| 0.3826341081128593 | 0.4894267709830127 | 0.2786740472980624 |
| 0.8821437881632307 | 0.4898925051368974 | 0.2785005389514540 |
| 0.3827053285664780 | 0.9895038253730767 | 0.2786141967256250 |
| 0.8821146456732393 | 0.9884937196690684 | 0.2785453755788855 |
| 0.3826445542520729 | 0.4895114338104439 | 0.7792648582973856 |
| 0.8825839097328415 | 0.4896624027926583 | 0.7785137302240934 |
| 0.3823646681176635 | 0.9895255759310944 | 0.7793653392185871 |
| 0.8827900759397637 | 0.9886633402936865 | 0.7788712883589064 |
| 0.3819739898272428 | 0.2620353168005316 | 0.0253176162751569 |
| 0.8823882641490208 | 0.2614004310430579 | 0.0284362138600514 |
| 0.3830178113629882 | 0.7605148117273222 | 0.0287076201000869 |
| 0.8824857796071363 | 0.7604960490871979 | 0.0286827306709509 |
| 0.3826241480298597 | 0.2605284521958667 | 0.5291194606631104 |
| 0.8826455931227157 | 0.2614666987284406 | 0.5288083209675174 |
| 0.3827228731399496 | 0.7604357353417660 | 0.5288493713499264 |
| 0.8825770570849349 | 0.7605852624251900 | 0.5286180727103568 |
| 0.1170779892497790 | 0.2402532941620392 | 0.4705695446320806 |
| 0.6173964591011675 | 0.2394464943156112 | 0.4713462252796277 |
| 0.1174779862267245 | 0.7392816176449012 | 0.4714284983111563 |
| 0.6173646462882518 | 0.7394908830643445 | 0.4712388628900749 |
| 0.1171142907463266 | 0.2413453235141604 | 0.9752133750937477 |
| 0.6169033495646011 | 0.2396358006377935 | 0.9712482002804240 |
| 0.1174448425087784 | 0.7394427356407085 | 0.9711737978832707 |
| 0.6173036208516410 | 0.7395380463956835 | 0.9712761522861613 |

### B. $1V_{Zn}1P_i$ -II

SYSTEM = ZnP2

|                     |                     |                     |
|---------------------|---------------------|---------------------|
| 1.0000000000000000  | \\                  |                     |
| 17.6369807634095999 | 0.0000000000000000  | -0.0504105781290306 |
| 0.0000000000000000  | 14.6753022059525247 | 0.0000000000000000  |
| -3.2408554168070340 | 0.0000000000000000  | 14.8647166764882588 |

Zn P  
63 129

Direct

|                    |                    |                    |
|--------------------|--------------------|--------------------|
| 0.1970913075188321 | 0.0462053260493320 | 0.1094606807407317 |
| 0.6951505829174209 | 0.0481130471004647 | 0.1105884851880106 |
| 0.1965122328434958 | 0.5486056837714273 | 0.1121054340068142 |
| 0.6959966271057709 | 0.5479158752640387 | 0.1116419711487850 |
| 0.1988455125951845 | 0.0437969231909747 | 0.6178212250427109 |
| 0.6950213736485651 | 0.0479657110854816 | 0.6135298122729651 |
| 0.1971757962133935 | 0.5485156796590331 | 0.6140014472593052 |
| 0.6957528225399088 | 0.5473604371218883 | 0.6125440541053848 |
| 0.3063245408754796 | 0.4592480649108026 | 0.3903596588904108 |
| 0.8036067963858784 | 0.4527212990820360 | 0.3875614581761084 |
| 0.3063618757830895 | 0.9523040701261039 | 0.3889226288261014 |
| 0.8029431786088210 | 0.9534609308694115 | 0.3876212831014882 |
| 0.3036528277237238 | 0.4532213223503589 | 0.8879005213848785 |

|                    |                    |                    |
|--------------------|--------------------|--------------------|
| 0.8035072291013066 | 0.4525519496690009 | 0.8876915554231672 |
| 0.3073569453278324 | 0.9531280754317208 | 0.8820054302557168 |
| 0.8033175827284964 | 0.9509730936198721 | 0.8877288078312446 |
| 0.3030015899149845 | 0.2979826777500989 | 0.1349204811814886 |
| 0.8030764933125525 | 0.2974938741845747 | 0.1365207893781459 |
| 0.3042787291717062 | 0.7980272871546816 | 0.1364961313294231 |
| 0.8034937817910546 | 0.7983826597073218 | 0.1377765773009756 |
| 0.3082126738479545 | 0.2973853740699610 | 0.6497707975104774 |
| 0.8031738957569772 | 0.2973205442181737 | 0.6382957292211202 |
| 0.3040229798581464 | 0.7959176225368907 | 0.6382614913060323 |
| 0.8033923809361809 | 0.7977603311642838 | 0.6374209048216173 |
| 0.2018906972431438 | 0.1928842400551147 | 0.3389640826875819 |
| 0.6950203775743020 | 0.2026988498007967 | 0.3622467174426092 |
| 0.1960284430386352 | 0.7057047431205277 | 0.3621424737787322 |
| 0.6960243471951273 | 0.7028433851555889 | 0.3623207060095837 |
| 0.1991206700975567 | 0.2010142470075138 | 0.8649993083429166 |
| 0.6976424403396706 | 0.2027107049933008 | 0.8626627071519479 |
| 0.1967286741050387 | 0.7030072646697789 | 0.8626526581061427 |
| 0.6959773494021633 | 0.7026340924237005 | 0.8623267590511077 |
| 0.0429291619369607 | 0.3735717561468448 | 0.1978630615124217 |
| 0.5403254507257813 | 0.3732938450897265 | 0.1964612675510011 |
| 0.0402339590127596 | 0.8726606390469200 | 0.1966222168239682 |
| 0.5403488279710231 | 0.8728585697584847 | 0.1959457316402577 |
| 0.0421612594790659 | 0.3733771618486585 | 0.6993646453860336 |
| 0.5406380604929453 | 0.3725860561135264 | 0.7004687220917205 |
| 0.0405268322772017 | 0.8724037577815551 | 0.6977754801463263 |
| 0.5404397362078726 | 0.8733432207560341 | 0.6989517336143791 |
| 0.4595186586697935 | 0.1259683732989316 | 0.3028793023825642 |
| 0.9599854749422505 | 0.1288881439850584 | 0.3010640630707115 |
| 0.4595333266623101 | 0.6272815902632090 | 0.3027869255314712 |
| 0.9586231248575956 | 0.6279134170004497 | 0.3018715643431449 |
| 0.9573137483790646 | 0.1251878048175712 | 0.8023421752481994 |
| 0.4590109145890651 | 0.6262652936630744 | 0.8031896779944532 |
| 0.9589428592315414 | 0.6267521551296227 | 0.8026469051605076 |
| 0.4589392874471940 | 0.1250421258862175 | 0.0426201690321477 |
| 0.9583689622969942 | 0.1223993553628162 | 0.0506862692132373 |
| 0.4592899354232500 | 0.6239236808962403 | 0.0525186188870279 |
| 0.9589717474417654 | 0.6232335851179727 | 0.0526302032020567 |
| 0.4598710437389713 | 0.1220118036161821 | 0.5636405311475841 |
| 0.9598897724655728 | 0.1238083918176827 | 0.5526184367109863 |
| 0.4597955211463969 | 0.6234142868892150 | 0.5540435904684813 |
| 0.9593381246668571 | 0.6240345364058015 | 0.5527765723347997 |
| 0.0356227253324519 | 0.3866797653698413 | 0.4457233355932360 |
| 0.5399657448598134 | 0.3766993194009203 | 0.4477984968121689 |
| 0.0408234128370921 | 0.8800339471605625 | 0.4477366519932602 |
| 0.5400104231375025 | 0.8765942177753274 | 0.4475234920561562 |
| 0.0410182705334634 | 0.3771024808391275 | 0.9469599036731964 |
| 0.5409306617062128 | 0.3776421480752745 | 0.9459497544034079 |
| 0.0405626708011724 | 0.8763456168980213 | 0.9468025919521139 |
| 0.5402338854927038 | 0.8778277678589532 | 0.9443872798044026 |
| 0.1210307065752048 | 0.2393301739669127 | 0.2022474798722271 |
| 0.6201912170718487 | 0.2408509752412726 | 0.2117491935050850 |
| 0.1208223122940808 | 0.7415010982013825 | 0.2125321615036597 |
| 0.6211916245033038 | 0.7411882215206518 | 0.2129893557911799 |
| 0.1195316929428714 | 0.2387867007826330 | 0.7208363428317170 |
| 0.6201863077523910 | 0.2400815823607374 | 0.7145337471612976 |
| 0.1208156493990913 | 0.7409024368655750 | 0.7129878461167181 |
| 0.6213154891613826 | 0.7414044141531164 | 0.7129154097331352 |

|                    |                    |                    |
|--------------------|--------------------|--------------------|
| 0.3761888845427208 | 0.2582613428375709 | 0.2864094127500465 |
| 0.8786406127187618 | 0.2593757135318313 | 0.2868123947684325 |
| 0.3788713719092556 | 0.7590355995357925 | 0.2864404079466993 |
| 0.8790111434005254 | 0.7604547461608249 | 0.2871713868737160 |
| 0.3841449433332826 | 0.2513662974874649 | 0.7937568071742476 |
| 0.8793643052960007 | 0.2591189955333562 | 0.7872584791487469 |
| 0.3788233992671977 | 0.7567890636981787 | 0.7868682956207351 |
| 0.8785094130348341 | 0.7585349995085267 | 0.7868776775561130 |
| 0.3791396116155354 | 0.4919353824119028 | 0.0373121259057783 |
| 0.8793920753024977 | 0.4907135345150380 | 0.0370688173699349 |
| 0.3796145844045000 | 0.9913326178070037 | 0.0346969260753553 |
| 0.8787461317166603 | 0.9904522839286329 | 0.0365720182736595 |
| 0.3795592045611116 | 0.4911655408361497 | 0.5400368778896834 |
| 0.8791455984472734 | 0.4912224851711500 | 0.5371855765077953 |
| 0.3783056431477689 | 0.9905735402133189 | 0.5390420272017380 |
| 0.8787446814082287 | 0.9917828251300520 | 0.5368869051652325 |
| 0.1230277999165921 | 0.0120748516815610 | 0.4645940092043048 |
| 0.6196749569425748 | 0.0093715299150787 | 0.4633132532443014 |
| 0.1213967147136970 | 0.5134270899840914 | 0.4637601110964340 |
| 0.6205694665486092 | 0.5087857690501352 | 0.4628204235823858 |
| 0.1209385249390564 | 0.0078862576811147 | 0.9616881648910294 |
| 0.6186705530244652 | 0.0119945715984997 | 0.9600748154418426 |
| 0.1209695451220512 | 0.5093542349979856 | 0.9630723629515785 |
| 0.6211312153875710 | 0.5097477673972648 | 0.9630442549852702 |
| 0.1867337076463116 | 0.2107875843556002 | 0.0999472370993502 |
| 0.6862824683908713 | 0.2127163759424917 | 0.1071477710569440 |
| 0.1867261831221185 | 0.7133490255097215 | 0.1077673328897859 |
| 0.6869107982571094 | 0.7128486915583068 | 0.1080858022709137 |
| 0.1919215165490300 | 0.2090167201022268 | 0.6248677133658305 |
| 0.6861791600424851 | 0.2125147187992482 | 0.6093044257389053 |
| 0.1862430987341668 | 0.7130495013347087 | 0.6079144677318169 |
| 0.6867554426943272 | 0.7122566213874393 | 0.6079519509380518 |
| 0.3143076536580409 | 0.2899018419129362 | 0.3984605950910449 |
| 0.8129706055793520 | 0.2875453477230323 | 0.3918128989013354 |
| 0.3140800066729597 | 0.7877339860782584 | 0.3920704194377365 |
| 0.8131079888964052 | 0.7883830217119723 | 0.3918844519677975 |
| 0.3135450706196892 | 0.2898905149191222 | 0.8906416913904422 |
| 0.8141135884533313 | 0.2879237506569936 | 0.8922053292383296 |
| 0.3133466683556421 | 0.7873360804271243 | 0.8911127561517489 |
| 0.8131855557619403 | 0.7868125194637372 | 0.8920740261011417 |
| 0.3129759153037313 | 0.4628579578193239 | 0.1415956573256523 |
| 0.8129894749433220 | 0.4623937730205014 | 0.1412487835947118 |
| 0.3144043152461080 | 0.9628727042456831 | 0.1403040587690256 |
| 0.8131506519929985 | 0.9635955142585644 | 0.1417001649785377 |
| 0.3130834225623929 | 0.4625043452168569 | 0.6442757130807308 |
| 0.8130836589181456 | 0.4623417493876119 | 0.6415770137478276 |
| 0.3143193387980006 | 0.9587548154560892 | 0.6451695670080682 |
| 0.8125119246399208 | 0.9628513846154974 | 0.6416909694484474 |
| 0.1872278712035609 | 0.0349840001255188 | 0.3564877778026840 |
| 0.6851812897044027 | 0.0381438866133479 | 0.3579216371473137 |
| 0.1871513684146748 | 0.5413322421729205 | 0.3583058337737555 |
| 0.6866496252835432 | 0.5376411562254901 | 0.3583246943101770 |
| 0.1881364437352744 | 0.0359412683846330 | 0.8583288880353166 |
| 0.6885419498117002 | 0.0373758788644523 | 0.8588090015265948 |
| 0.1867801808466609 | 0.5384192570140414 | 0.8585775747696189 |
| 0.6869983142422313 | 0.5380348704916926 | 0.8583416922895353 |
| 0.0390257358452288 | 0.1265650841281385 | 0.1950488623545112 |
| 0.5378585066948247 | 0.1279425714634144 | 0.1932204200158836 |



|                    |                    |                    |
|--------------------|--------------------|--------------------|
| 0.0389591662517716 | 0.6283784177949059 | 0.1973855743551738 |
| 0.5390725524610076 | 0.6282928338237639 | 0.1975806120548995 |
| 0.0379164723857812 | 0.1259455090680532 | 0.6985154199742567 |
| 0.5375617012792375 | 0.1284798980321114 | 0.7136505409637692 |
| 0.0387713024382137 | 0.6279776717617267 | 0.6976158067143530 |
| 0.5394724290111625 | 0.6282976716557371 | 0.6985063963034222 |
| 0.4591463050410809 | 0.3704367012902452 | 0.3026238375503283 |
| 0.9605704947422922 | 0.3722354363834413 | 0.3008206552977484 |
| 0.4613713625887073 | 0.8715925994084230 | 0.3019231376051437 |
| 0.9612779769409059 | 0.8733736314568574 | 0.3026528585571526 |
| 0.4593668142393810 | 0.3700697438586857 | 0.8034975069101620 |
| 0.9609154385323535 | 0.3725071871489263 | 0.8024611096127927 |
| 0.4590265716461204 | 0.8716193996601689 | 0.8012673208951924 |
| 0.9604893069886558 | 0.8713582502458337 | 0.8021935235568520 |
| 0.4610850231407042 | 0.3789376050190043 | 0.0521115521819056 |
| 0.9619682772989293 | 0.3781328650467373 | 0.0529856431384843 |
| 0.4615244440093420 | 0.8784292683755339 | 0.0510733816607640 |
| 0.9609200108831715 | 0.8777686895862900 | 0.0521480673413066 |
| 0.4613244856587855 | 0.3779228574052382 | 0.5544001805639454 |
| 0.9610888808104008 | 0.3777977679761051 | 0.5543534238351242 |
| 0.4611094748402849 | 0.8780901908335110 | 0.5531549749425437 |
| 0.9610708217408686 | 0.8792247484883333 | 0.5526942453197847 |
| 0.0430310126782558 | 0.1256962589119794 | 0.4472608178758719 |
| 0.5376379097990522 | 0.1226972913244211 | 0.4513765298382069 |
| 0.0384180113254189 | 0.6258133092451104 | 0.4467830776576349 |
| 0.5386703869198541 | 0.6218534553457715 | 0.4478067254370472 |
| 0.0384538857937713 | 0.1204967588817070 | 0.9458847389227785 |
| 0.5374968392701049 | 0.1255235970761177 | 0.9316850981060867 |
| 0.0385926013991309 | 0.6220029329350396 | 0.9475530286990477 |
| 0.5393164257910072 | 0.6227759756373672 | 0.9477293409340248 |
| 0.1175732135845848 | 0.0093556364608247 | 0.2192879486740651 |
| 0.6165603944946341 | 0.0106631621690809 | 0.2205782016909978 |
| 0.1181936013464835 | 0.5118048720386099 | 0.2221142198908908 |
| 0.6172595628123005 | 0.5106178736715279 | 0.2217074770822762 |
| 0.1169000858137821 | 0.0092162532237765 | 0.7227646217735071 |
| 0.6158791432523216 | 0.0121296822920272 | 0.7234830441853219 |
| 0.1177331947151785 | 0.5109898907988750 | 0.7219394170170261 |
| 0.6174486357697901 | 0.5104735538039549 | 0.7217836630048069 |
| 0.3828393778681232 | 0.4893638831295917 | 0.2779313402771493 |
| 0.8821443633847252 | 0.4898739725731360 | 0.2777798719020055 |
| 0.3829830146371052 | 0.9890651389083942 | 0.2777243847082858 |
| 0.8828241240506287 | 0.9908141782182085 | 0.2789038643221247 |
| 0.3832038732013032 | 0.4898228694159528 | 0.7801949586196884 |
| 0.8822435314095429 | 0.4894565148937602 | 0.7782932913527389 |
| 0.3873823594515144 | 0.9941406082581423 | 0.7773267079475943 |
| 0.8816482092452347 | 0.9883157587462961 | 0.7785243890227420 |
| 0.3822662051024750 | 0.2618267481131156 | 0.0277871968373162 |
| 0.8833505646723268 | 0.2607566780721484 | 0.0288069247109632 |
| 0.3828926874894023 | 0.7609839887477889 | 0.0278215658751790 |
| 0.8824317140163700 | 0.7604579658984889 | 0.0288765131481554 |
| 0.3829850426909616 | 0.2602862971272017 | 0.5349266334067835 |
| 0.8825481659066625 | 0.2604548263324276 | 0.5284023369814008 |
| 0.3830328104011329 | 0.7602362486289991 | 0.5287760202989418 |
| 0.8827661831127145 | 0.7615821509052196 | 0.5284090862448352 |
| 0.1205088289104737 | 0.2427843414999558 | 0.4941329321989869 |
| 0.6166957581984605 | 0.2395467131905065 | 0.4727152108611179 |
| 0.1173239089546030 | 0.7425460250082239 | 0.4715236802385903 |
| 0.6171759042969072 | 0.7393680693925404 | 0.4713842923696205 |

|                    |                    |                    |
|--------------------|--------------------|--------------------|
| 0.1162227429199660 | 0.2384713451745952 | 0.9658970250555470 |
| 0.6172912819995915 | 0.2402680220287294 | 0.9699567470193884 |
| 0.1170464776770004 | 0.7393843876909969 | 0.9711290616237704 |
| 0.6175201658732377 | 0.7403682620339254 | 0.9714391457654088 |
| 0.1783411624380591 | 0.3293151454314582 | 0.4214366229542890 |

C.  $2V_{Zn}1P_I-I$ 

SYSTEM = ZnP2

1.0000000000000000

|                     |                     |                     |
|---------------------|---------------------|---------------------|
| 17.6369807634095999 | 0.0000000000000000  | -0.0504105781290306 |
| 0.0000000000000000  | 14.6753022059525247 | 0.0000000000000000  |
| -3.2408554168070340 | 0.0000000000000000  | 14.8647166764882588 |

Zn P

62 129

Direct

|                    |                    |                    |
|--------------------|--------------------|--------------------|
| 0.1971033226615799 | 0.0460612306638881 | 0.1124973014010982 |
| 0.6955316146987160 | 0.0477238179053051 | 0.1120337235632871 |
| 0.1966119137921678 | 0.5478329649462683 | 0.1119499030505408 |
| 0.6959841600955440 | 0.5477926019879675 | 0.1118700907321355 |
| 0.1962828793077758 | 0.0460849420429306 | 0.6135093192372952 |
| 0.6959541061700057 | 0.0475784469226360 | 0.6125114015177223 |
| 0.1973686063796812 | 0.5478998694393928 | 0.6138588158243559 |
| 0.6961839491363256 | 0.5478794263087884 | 0.6124967374970416 |
| 0.3084836011896942 | 0.4596644477984900 | 0.3883059004523257 |
| 0.8031782989956134 | 0.4526150635955842 | 0.3873078040044710 |
| 0.3008209696806112 | 0.9519437268617753 | 0.3869944411237889 |
| 0.8029288767649457 | 0.9517244896625565 | 0.3875187481349804 |
| 0.3029515614902892 | 0.4447128889108738 | 0.8876734079321221 |
| 0.8033698295421703 | 0.4529262233185035 | 0.8870359505129929 |
| 0.3001365527351233 | 0.9522662371188902 | 0.8868576119365098 |
| 0.8028900124038771 | 0.9518207153484340 | 0.8872490986348599 |
| 0.3046572095861065 | 0.2976513908146196 | 0.1345889632901199 |
| 0.8026816649745747 | 0.2981949986346397 | 0.1378247593842222 |
| 0.3039011911300586 | 0.7979251265526995 | 0.1373400885824606 |
| 0.8033493149505160 | 0.7971998867190994 | 0.1374744923195068 |
| 0.3052335415754399 | 0.2975377656631960 | 0.6408363374742431 |
| 0.8032230597204042 | 0.2979825601742158 | 0.6378560725295687 |
| 0.3039700202151063 | 0.7978752002160474 | 0.6381114808577051 |
| 0.8035494240528724 | 0.7975576790670940 | 0.6377670040890275 |
| 0.6960246208003390 | 0.2022869542581255 | 0.3622194750284674 |
| 0.1964145454503993 | 0.7045640308839428 | 0.3617818961888107 |
| 0.6960520285104528 | 0.7026333505874507 | 0.3622417155672101 |
| 0.6956551866499596 | 0.2024409244593324 | 0.8623454146064069 |
| 0.1971202209445613 | 0.7016973267607021 | 0.8625525260473934 |
| 0.6961040688687740 | 0.7026362005326251 | 0.8622390112516609 |
| 0.0410742790781773 | 0.3737627326075129 | 0.1971908081957433 |
| 0.5411464896117272 | 0.3730741493195137 | 0.1963168589118494 |
| 0.0409956250379642 | 0.8731279363596267 | 0.1962647689481382 |
| 0.5403949303042489 | 0.8730569294634820 | 0.1968119349557049 |
| 0.0424576725989654 | 0.3726155978453507 | 0.6981693923645355 |
| 0.5411763819940487 | 0.3738349591373872 | 0.6985475269056181 |
| 0.0417968644196130 | 0.8734829660280433 | 0.6972675861644462 |
| 0.5406148714055121 | 0.8732079308638790 | 0.6973144630913380 |
| 0.4577237698132134 | 0.1273550326398560 | 0.3030203155871278 |
| 0.9570624592396478 | 0.1257912368874347 | 0.2994185620938261 |
| 0.4597151533278723 | 0.6276992399160827 | 0.3028552406330684 |

|                    |                    |                    |
|--------------------|--------------------|--------------------|
| 0.9590645887741801 | 0.6273404485889008 | 0.3025989941164136 |
| 0.4572567255115062 | 0.1285474992713083 | 0.8029703403700275 |
| 0.9585083906466139 | 0.1260851215123434 | 0.8015853994946425 |
| 0.4589845717468020 | 0.6265419397245089 | 0.8030614973986026 |
| 0.9594866628272382 | 0.6270594727512567 | 0.8031717712396220 |
| 0.4572231172621360 | 0.1247730265730270 | 0.0517799228625146 |
| 0.9554188484153590 | 0.1245294337680928 | 0.0511186303774832 |
| 0.4589529284491292 | 0.6229415776671887 | 0.0527206718263190 |
| 0.9593640271569850 | 0.6233765581624386 | 0.0529651269030448 |
| 0.4587631716530666 | 0.1229828250695233 | 0.5530160090851660 |
| 0.9598123224627858 | 0.1246662812098616 | 0.5513375019871988 |
| 0.4599314368142453 | 0.6239441251532966 | 0.5537031594392379 |
| 0.9591901818418231 | 0.6237065962603962 | 0.5534859705251258 |
| 0.0367958148028104 | 0.3824180632573453 | 0.4479861450483491 |
| 0.5414953418669386 | 0.3770774021517693 | 0.4474567732917622 |
| 0.0404953531327525 | 0.8777609975991629 | 0.4476677611110670 |
| 0.5404435301175500 | 0.8767294517771420 | 0.4469647630978211 |
| 0.0412610514300308 | 0.3782844612019011 | 0.9469165501084381 |
| 0.5402449534979661 | 0.3774462552381841 | 0.9468308795105783 |
| 0.0412932802858866 | 0.8775872320853380 | 0.9474853740839011 |
| 0.5406428319692925 | 0.8769401456589369 | 0.9469592455503711 |
| 0.1184911053096077 | 0.2405147435369591 | 0.2072766914980941 |
| 0.6208277745232313 | 0.2409467819345780 | 0.2129313749972967 |
| 0.1206702265157346 | 0.7413165861710191 | 0.2120653341758107 |
| 0.6209795942657776 | 0.7409937985411339 | 0.2129077943077538 |
| 0.1214263236855119 | 0.2399221981517277 | 0.7154923258458192 |
| 0.6207117353628481 | 0.2412363016334285 | 0.7127663998058066 |
| 0.1213485972546233 | 0.7407405965686458 | 0.7130956583334990 |
| 0.6211352856483151 | 0.7411507471897834 | 0.7129552978731087 |
| 0.3728283620878162 | 0.2588262593854383 | 0.2869847581023083 |
| 0.8787469922012753 | 0.2592686809754443 | 0.2867406675387768 |
| 0.3791940231446442 | 0.7590184211589531 | 0.2870208928429291 |
| 0.8785550807220937 | 0.7593182367180554 | 0.2866859571730981 |
| 0.3778766869254914 | 0.2601976618668260 | 0.7906115802079199 |
| 0.8795484876202897 | 0.2592650355697658 | 0.7877852383671029 |
| 0.3793228675515478 | 0.7589824157003809 | 0.7873532718429165 |
| 0.8789920821858108 | 0.7590417433539803 | 0.7871422110666871 |
| 0.3787443925507320 | 0.4911458825613630 | 0.0361703948319155 |
| 0.8784721721329649 | 0.4913096037717797 | 0.0368806560869789 |
| 0.3787674494956030 | 0.9910129154855915 | 0.0361967562071024 |
| 0.8781785831587356 | 0.9902332351763101 | 0.0369229882687664 |
| 0.3801580038755025 | 0.4922686401481788 | 0.5393155893645915 |
| 0.8779613571902104 | 0.4919084939554980 | 0.5372367872754789 |
| 0.3788239980231474 | 0.9906079196049707 | 0.5364441108327812 |
| 0.8792942336224635 | 0.9911275426926668 | 0.5371709832975468 |
| 0.1234218162345248 | 0.0086767566937154 | 0.4608691665650975 |
| 0.6207821907007067 | 0.0091721772484883 | 0.4628327678540409 |
| 0.1207942718344426 | 0.5098158942830920 | 0.4622926022924033 |
| 0.6211664167002515 | 0.5091669322789909 | 0.4629613105647567 |
| 0.1230414279021955 | 0.0083345152572330 | 0.9617948390040174 |
| 0.6207238596237633 | 0.0092841759224257 | 0.9627169944158064 |
| 0.1216375935936858 | 0.5093854509397673 | 0.9626293478250532 |
| 0.6211666746718006 | 0.5091268967352095 | 0.9627858186153304 |
| 0.1893397505887399 | 0.2108960486788498 | 0.1085644354202015 |
| 0.6863978169835466 | 0.2125276039304811 | 0.1078928470541423 |
| 0.1868786382146327 | 0.7128120328453365 | 0.1078867523471338 |
| 0.6865934183459536 | 0.7124348409209385 | 0.1080285871997925 |
| 0.1880657018814185 | 0.2114617371398212 | 0.6155054288938331 |

|                    |                    |                    |
|--------------------|--------------------|--------------------|
| 0.6867036517256591 | 0.2125980860363439 | 0.6082563842816898 |
| 0.1867467950958250 | 0.7131384626646559 | 0.6077069233821872 |
| 0.6866739293056373 | 0.7125811610365574 | 0.6079403573739465 |
| 0.3115524181809782 | 0.2895782131690333 | 0.4002812742769600 |
| 0.8131853239903813 | 0.2875610024259573 | 0.3918251818911656 |
| 0.3142643802823550 | 0.7879904069646128 | 0.3923690744300255 |
| 0.8131009756025849 | 0.7872970324475070 | 0.3919552487888183 |
| 0.3065141421707752 | 0.2813377979429159 | 0.8910730276825011 |
| 0.8128360663117892 | 0.2878393962141393 | 0.8914955610258436 |
| 0.3136750880937126 | 0.7874690539654482 | 0.8920946161691496 |
| 0.8130959571420227 | 0.7873840706561017 | 0.8917805694394203 |
| 0.3134125719131275 | 0.4624007239834280 | 0.1410149706814105 |
| 0.8127034856986622 | 0.4626815093223506 | 0.1416711327996079 |
| 0.3140298625382796 | 0.9624722541391949 | 0.1417999222567955 |
| 0.8124959913575303 | 0.9623095109340186 | 0.1417178605452473 |
| 0.3138858314043547 | 0.4621412599811252 | 0.6431282895330521 |
| 0.8128393239810719 | 0.4628462375863934 | 0.6420678200425023 |
| 0.3139154217851374 | 0.9625931257530524 | 0.6422147645603629 |
| 0.8132574738358327 | 0.9628670166700196 | 0.6421311183628754 |
| 0.1891994051467980 | 0.0433739050480339 | 0.3581634458711947 |
| 0.6864003392372464 | 0.0376116029029369 | 0.3578191341465127 |
| 0.1874503357105129 | 0.5402490385245661 | 0.3582695078006851 |
| 0.6867537528663328 | 0.5378133844803074 | 0.3582302020400398 |
| 0.1883867559241084 | 0.0441522116588755 | 0.8583948769576275 |
| 0.6865141055797516 | 0.0377072341514214 | 0.8578913365373603 |
| 0.1880442543186550 | 0.5367417171185005 | 0.8583495094044737 |
| 0.6868544012822023 | 0.5379909846153126 | 0.8580307138442335 |
| 0.0432545920479442 | 0.1272945165153581 | 0.1963902761784665 |
| 0.5379896633046094 | 0.1286993795411450 | 0.1972433982807408 |
| 0.0392433105497357 | 0.6280000567233989 | 0.1974420482745505 |
| 0.5389288263817202 | 0.6281548570395372 | 0.1977036257864432 |
| 0.0418154935008982 | 0.1264406442453624 | 0.6987865330026012 |
| 0.5383831481080740 | 0.1285714637469754 | 0.6982230929512503 |
| 0.0393143356405170 | 0.6278757146024345 | 0.6982138678438432 |
| 0.5392382997373436 | 0.6281643718709394 | 0.6982375584733612 |
| 0.4578818545662962 | 0.3700269745294493 | 0.3032063132803388 |
| 0.9606371533406879 | 0.3725820994670561 | 0.3017994836034396 |
| 0.4611690298326469 | 0.8721098325541724 | 0.3021284210930990 |
| 0.9613261001471681 | 0.8715434788032738 | 0.3020983067594653 |
| 0.4609805745853525 | 0.3721161508761591 | 0.8024122020270320 |
| 0.9613954934339003 | 0.3724203100970552 | 0.8023247316357018 |
| 0.4610244508535546 | 0.8723598298563958 | 0.8023734137221054 |
| 0.9615142769000500 | 0.8715011740674513 | 0.8022739116248896 |
| 0.4609431617899076 | 0.3786660138114674 | 0.0524085178077857 |
| 0.9610481395913997 | 0.3787596949322092 | 0.0522456689654086 |
| 0.4610903600233076 | 0.8783752865222945 | 0.0520893677958301 |
| 0.9606849809067397 | 0.8777067537481559 | 0.0519924670411773 |
| 0.4618423030798017 | 0.3793748664225726 | 0.5525542755317220 |
| 0.9597610416857055 | 0.3789817643518740 | 0.5540860733317738 |
| 0.4613550417729931 | 0.8780585608643735 | 0.5524622993813252 |
| 0.9607901648585550 | 0.8776763546632081 | 0.5527450108400883 |
| 0.0440685903056315 | 0.1235705295562359 | 0.4443204417302847 |
| 0.5387958131260837 | 0.1224296301234731 | 0.4479170065962073 |
| 0.0389325840910144 | 0.6238856252504400 | 0.4475540405662713 |
| 0.5389130989389339 | 0.6218751780737922 | 0.4478139400329046 |
| 0.0435082991052332 | 0.1243699970877047 | 0.9492557779531854 |
| 0.5385665232596855 | 0.1221505372369785 | 0.9476358535707038 |
| 0.0392510702120063 | 0.6219297835962214 | 0.9478525142134089 |

|                    |                    |                    |
|--------------------|--------------------|--------------------|
| 0.5391075999285728 | 0.6220369604604772 | 0.9478136991214036 |
| 0.1201001345766888 | 0.0080793852823806 | 0.2228089470574956 |
| 0.6165762898087040 | 0.0110213602348708 | 0.2212337211795213 |
| 0.1184598269562854 | 0.5112762192731112 | 0.2217721097362095 |
| 0.6172154550412057 | 0.5107149254309336 | 0.2218607685509561 |
| 0.1193172359318725 | 0.0082774250485089 | 0.7241763948775927 |
| 0.6168240942601310 | 0.0110873024052466 | 0.7212210038889453 |
| 0.1177970337731777 | 0.5104528621311235 | 0.7220934629626869 |
| 0.6177112734476187 | 0.5109471963412304 | 0.7213119313455157 |
| 0.3838758718747851 | 0.4907036279631139 | 0.2763997587872754 |
| 0.8820599025554343 | 0.4896612075186841 | 0.2782092869815458 |
| 0.3822031584935049 | 0.9889962974403120 | 0.2790957207728714 |
| 0.8823002770262548 | 0.9884138598402307 | 0.2784316259826268 |
| 0.3828598095589943 | 0.4894876856786308 | 0.7799762721126856 |
| 0.8827516242700590 | 0.4896326272644170 | 0.7785036676278064 |
| 0.3823202663206406 | 0.9894881574467319 | 0.7793664076678463 |
| 0.8828334758473170 | 0.9886312032299304 | 0.7789948392619453 |
| 0.3821484885399246 | 0.2618478930255646 | 0.0261153750488566 |
| 0.8822251825393653 | 0.2618746342307131 | 0.0284334849009212 |
| 0.3830392030359305 | 0.7606053026610624 | 0.0287053487318946 |
| 0.8823929105641608 | 0.7605254366955292 | 0.0285738427890041 |
| 0.3836791748191623 | 0.2619076329337586 | 0.5325369130261745 |
| 0.8821367728561854 | 0.2608190376538585 | 0.5289171166767559 |
| 0.3831301153547824 | 0.7604587761952356 | 0.5290636676481083 |
| 0.8822114523448973 | 0.7607247947560324 | 0.5289793970480999 |
| 0.1172448117900399 | 0.2447163073763854 | 0.4799826146472695 |
| 0.6174574835750968 | 0.2395780576656772 | 0.4714561128393442 |
| 0.1170322148725518 | 0.7411593759539438 | 0.4716595384138008 |
| 0.6172856556188612 | 0.7393954734150440 | 0.4712418568399386 |
| 0.1154525207147174 | 0.2410134933414084 | 0.9785199038033410 |
| 0.6168033532468084 | 0.2396409016185932 | 0.9712885732527126 |
| 0.1175919572219183 | 0.7395337114729064 | 0.9712093404416419 |
| 0.6173642610279803 | 0.7395232047247575 | 0.9713512290036116 |
| 0.1988774790120793 | 0.3214050084312170 | 0.4173670027173079 |

D.  $2V_{zn}1P_i-II$ 

SYSTEM = ZnP2

1.0000000000000000

17.6369807634095999 0.0000000000000000 -0.0504105781290306

0.0000000000000000 14.6753022059525247 0.0000000000000000

-3.2408554168070340 0.0000000000000000 14.8647166764882588

Zn P

62 129

Direct

|                    |                    |                    |
|--------------------|--------------------|--------------------|
| 0.1972077264752059 | 0.0456855774017415 | 0.1069966416678779 |
| 0.6940459171508030 | 0.0485862276651361 | 0.1107610603385934 |
| 0.1961850871291611 | 0.5485315550697305 | 0.1118920121069487 |
| 0.6961256461441089 | 0.5468725457311431 | 0.1133835422695662 |
| 0.1994374353584598 | 0.0451353055863029 | 0.6151090288478663 |
| 0.6927123643516334 | 0.0492539077985545 | 0.6130098578859258 |
| 0.1964045383310566 | 0.5473350167169906 | 0.6128488726848731 |
| 0.6951220018500689 | 0.5466786333952638 | 0.6127216118891879 |
| 0.3080828862139430 | 0.4671502918335759 | 0.3921853495465349 |
| 0.8034927168328500 | 0.4523009286307711 | 0.3877489468878690 |
| 0.3095967576913813 | 0.9534340920273587 | 0.3939896931417901 |

|                    |                    |                    |
|--------------------|--------------------|--------------------|
| 0.8025562128179103 | 0.9542252554241719 | 0.3865531934209058 |
| 0.3029601658132740 | 0.4531708641302940 | 0.8880705524119554 |
| 0.8041610878381891 | 0.4527023522496169 | 0.8881978632527764 |
| 0.3058306795313004 | 0.9521956767951231 | 0.8818195415868416 |
| 0.8062124203847945 | 0.9487703400780506 | 0.8874258634883293 |
| 0.3021017889919139 | 0.2978519265595806 | 0.1363418023195558 |
| 0.8027295297400446 | 0.2965394574069833 | 0.1365626699150223 |
| 0.3040822559061032 | 0.7984275436720879 | 0.1368780375166042 |
| 0.8036857686504345 | 0.7984651221876988 | 0.1377218957815059 |
| 0.3120544687408747 | 0.2956984300076855 | 0.6464119099443426 |
| 0.8008148162968918 | 0.2963214153440666 | 0.6392258832083674 |
| 0.3022129860219318 | 0.7948666697977613 | 0.6375169931330984 |
| 0.8034197807086535 | 0.7983770603713268 | 0.6364416366053577 |
| 0.1976894918490696 | 0.1899788540075917 | 0.3314726571481340 |
| 0.6936612123023167 | 0.2026581801726209 | 0.3646432798099650 |
| 0.1952055520447738 | 0.7065313922096197 | 0.3625063845740122 |
| 0.6963323638386605 | 0.7024804816907007 | 0.3629425188128941 |
| 0.1987723480577776 | 0.2012858870111266 | 0.8614400334986555 |
| 0.7024668557247504 | 0.2027579604180747 | 0.8652045445476343 |
| 0.1956958096595383 | 0.7022592968074506 | 0.8619997207459102 |
| 0.6970496707808064 | 0.7020528645808634 | 0.8628155624294662 |
| 0.0430198505313103 | 0.3736706922343396 | 0.1984165706950878 |
| 0.5375989897959322 | 0.3723559212009956 | 0.1990199970011814 |
| 0.0401480694508068 | 0.8721668572771120 | 0.1959251648628734 |
| 0.5417206904643450 | 0.8735457644333093 | 0.1973227223347823 |
| 0.0417745105617738 | 0.3730630041487458 | 0.6981167959990686 |
| 0.5397716486801070 | 0.3741997672549392 | 0.7014051482311279 |
| 0.0406673337412826 | 0.8728954874529695 | 0.6961898360573731 |
| 0.5430716435723841 | 0.8749479865732216 | 0.6995721051242965 |
| 0.4608245418203069 | 0.1280613673794044 | 0.3099820891158597 |
| 0.9609072977705148 | 0.1286403726445590 | 0.3007068211302501 |
| 0.4597744099794174 | 0.6265658110407443 | 0.3036255383394602 |
| 0.9588995616335021 | 0.6276281881034862 | 0.3022468393581511 |
| 0.9578591221705817 | 0.1250307593488498 | 0.7999835646607295 |
| 0.4595563606979738 | 0.6252688713960557 | 0.8038971142451476 |
| 0.9587682527845363 | 0.6262618754475494 | 0.8024225486456604 |
| 0.4590555293583319 | 0.1266696098340387 | 0.0384955104343292 |
| 0.9581001493531892 | 0.1215391764310272 | 0.0486273588625731 |
| 0.4595359202841378 | 0.6226078558696959 | 0.0532965932146655 |
| 0.9590451675311076 | 0.6227839574445836 | 0.0531038169017774 |
| 0.9607273777478025 | 0.1250423031077426 | 0.5501960935836087 |
| 0.4604856204062473 | 0.6241283079660066 | 0.5556019828152476 |
| 0.9586216306491343 | 0.6238838064303202 | 0.5525764292992704 |
| 0.0370368004314340 | 0.3831692721153218 | 0.4485559990606984 |
| 0.5387521956806534 | 0.3750556760239153 | 0.4492757961140534 |
| 0.0409887714130948 | 0.8808503235625242 | 0.4468924090363585 |
| 0.5421210556943754 | 0.8773890565025834 | 0.4504648394999737 |
| 0.0406689615755632 | 0.3767820523126963 | 0.9465999815565853 |
| 0.5401446828928069 | 0.3789957130830761 | 0.9463357435463959 |
| 0.0402435000648342 | 0.8759743062339733 | 0.9456944720278462 |
| 0.5426379221371910 | 0.8765368280909159 | 0.9436081205654375 |
| 0.1189457114839886 | 0.2380757439087737 | 0.1961705586415260 |
| 0.6186873898357754 | 0.2408219249313259 | 0.2112123293001124 |
| 0.1207209198067447 | 0.7414917168250303 | 0.2123065216376287 |
| 0.6212162305954843 | 0.7409217997572890 | 0.2133144976652039 |
| 0.1207174762132232 | 0.2394694790346454 | 0.7169686631398745 |
| 0.6183511972534841 | 0.2409156586979832 | 0.7228119188934430 |
| 0.1202520409243573 | 0.7407760576056780 | 0.7126043531352049 |

|                    |                    |                    |
|--------------------|--------------------|--------------------|
| 0.6222970536388067 | 0.7418382468237988 | 0.7136113734305642 |
| 0.3698749003302231 | 0.2564780691457871 | 0.2901669140511003 |
| 0.8785055658202208 | 0.2586886493203060 | 0.2868213882014318 |
| 0.3789518358780375 | 0.7587162176332403 | 0.2878770444938980 |
| 0.8790393603543223 | 0.7602623531091554 | 0.2868217117749684 |
| 0.3845311870885359 | 0.2527618121245882 | 0.7942450137653889 |
| 0.8801522806365827 | 0.2590174898437175 | 0.7870292056715477 |
| 0.3786013208445652 | 0.7556442457511299 | 0.7869729721912128 |
| 0.8788129346718220 | 0.7581664879226788 | 0.7858382660744921 |
| 0.3786462754667888 | 0.4915287161040233 | 0.0372995188604765 |
| 0.8793735040230601 | 0.4903890840361468 | 0.0377255627575226 |
| 0.3808468504614865 | 0.9909259786307528 | 0.0335382712146982 |
| 0.8788864070233555 | 0.9897986698445428 | 0.0359173316144744 |
| 0.3804149448726015 | 0.4937574030132497 | 0.5426257262338354 |
| 0.8777599263288447 | 0.4913722023870981 | 0.5376593123550649 |
| 0.3824874962877609 | 0.9986908019759103 | 0.5441807111656409 |
| 0.8781780852757927 | 0.9929425062244631 | 0.5360183161648878 |
| 0.1239050272427304 | 0.0122235170435818 | 0.4623244382062611 |
| 0.6180406780283449 | 0.0118116647541681 | 0.4627111837554570 |
| 0.1206550309986557 | 0.5122292859838640 | 0.4629449711271054 |
| 0.6200577894451517 | 0.5077506815720102 | 0.4628847497257491 |
| 0.1208601814738765 | 0.0073907894773118 | 0.9596286794997004 |
| 0.6205097194302756 | 0.0116397818116540 | 0.9574174277698664 |
| 0.1205792066508374 | 0.5091316710286382 | 0.9630050547119049 |
| 0.6218619560612667 | 0.5096118633632710 | 0.9641407674968743 |
| 0.1861813548364449 | 0.2102328199657141 | 0.0959329832866955 |
| 0.6837858036935630 | 0.2127586234680484 | 0.1050739305330354 |
| 0.1866482745995213 | 0.7134005641179909 | 0.1075279569911022 |
| 0.6873070008384585 | 0.7124102240744558 | 0.1088428195574687 |
| 0.1929387490791623 | 0.2104512023632543 | 0.6203328487770531 |
| 0.6818534366556234 | 0.2125007965655900 | 0.6141493756344659 |
| 0.1853288239453801 | 0.7118852228013794 | 0.6076053284041733 |
| 0.6871943285763786 | 0.7119446205612411 | 0.6081816192438205 |
| 0.3175085948930130 | 0.2992644889816917 | 0.4099660766164442 |
| 0.8121961255579605 | 0.2871466951247295 | 0.3915742215056295 |
| 0.3139100312351334 | 0.7878744731767792 | 0.3933503525732183 |
| 0.8129472531649824 | 0.7888566179907419 | 0.3913071843919856 |
| 0.3133624016473647 | 0.2898585056521069 | 0.8908022004944449 |
| 0.8164154015934865 | 0.2884522729611268 | 0.8928470143344747 |
| 0.3127597797559928 | 0.7865148630864220 | 0.8908606488193619 |
| 0.8140346359890505 | 0.7858537079091202 | 0.8916858819256469 |
| 0.3126337143421278 | 0.4629617756559100 | 0.1417385879922667 |
| 0.8134410392109475 | 0.4616875055651168 | 0.1423701016544126 |
| 0.3155280855514337 | 0.9633915312937312 | 0.1401899699100742 |
| 0.8126437686004754 | 0.9637909282153578 | 0.1407353492858806 |
| 0.3127197131904309 | 0.4627124325095348 | 0.6446371585810267 |
| 0.8120627691871466 | 0.4618576615042368 | 0.6421463873203679 |
| 0.3128447580635945 | 0.9564997258561256 | 0.6418298838115292 |
| 0.8115822595980533 | 0.9636697801555703 | 0.6411455138958877 |
| 0.1885155269256797 | 0.0330446211367448 | 0.3542293405949621 |
| 0.6848133901989079 | 0.0383485316699397 | 0.3578053227883072 |
| 0.1866371419776760 | 0.5429093732060951 | 0.3587017200681974 |
| 0.6863514078263507 | 0.5373923690043098 | 0.3587563885121366 |
| 0.1877048470021962 | 0.0360814555980067 | 0.8559889757494036 |
| 0.6935394416794411 | 0.0360797533729027 | 0.8606606937074069 |
| 0.1860862672317627 | 0.5379900417681600 | 0.8582417514185369 |
| 0.6875708389164449 | 0.5379414005948557 | 0.8592388392166305 |
| 0.0385094263955407 | 0.1243909782713317 | 0.1926246643563229 |

|                    |                    |                    |
|--------------------|--------------------|--------------------|
| 0.5358238177852701 | 0.1286515669514516 | 0.1919464300780722 |
| 0.0392173068484789 | 0.6280758263730465 | 0.1975684361747384 |
| 0.5389275415760012 | 0.6282305112624756 | 0.1982063545425397 |
| 0.0386174552277009 | 0.1267761601716920 | 0.6962209298883439 |
| 0.5347972354161953 | 0.1289270413094031 | 0.7395082889584552 |
| 0.0383088569840832 | 0.6277232467844123 | 0.6974368086089597 |
| 0.5401724879183701 | 0.6290574571573868 | 0.6996482996619225 |
| 0.4553889541032782 | 0.3675594898466780 | 0.3045142969998390 |
| 0.9614958861549336 | 0.3708543542390764 | 0.3023795436113778 |
| 0.4607367278673629 | 0.8719194711815658 | 0.3032691138259489 |
| 0.9610482818086697 | 0.8734312637728754 | 0.3017601277009664 |
| 0.4587022533573355 | 0.3720385816539670 | 0.8044491779597688 |
| 0.9612837360534353 | 0.3725635584965393 | 0.8020093036476478 |
| 0.4564130216131262 | 0.8721490148398514 | 0.7999641906999965 |
| 0.9608217601676605 | 0.8709747698095031 | 0.8008610374516826 |
| 0.4610366803378624 | 0.3789072844224138 | 0.0531198804244947 |
| 0.9623771196772857 | 0.3782555886212057 | 0.0536291364831595 |
| 0.4615397152056901 | 0.8771880519098229 | 0.0502426976299717 |
| 0.9610383034998532 | 0.8772476100757374 | 0.0516553462388605 |
| 0.4613753054147137 | 0.3795560203192641 | 0.5561763876619229 |
| 0.9592773251776550 | 0.3781491834319574 | 0.5541922368642462 |
| 0.4576358025961089 | 0.8810601728751671 | 0.5538368219135871 |
| 0.9605294096153236 | 0.8803743421233937 | 0.5515738425314873 |
| 0.0452203832924660 | 0.1270957321385388 | 0.4455542876924087 |
| 0.5335455963267690 | 0.1209765341461837 | 0.4608804883984043 |
| 0.0382016638623441 | 0.6249142667295112 | 0.4471238218394554 |
| 0.5386208858257053 | 0.6214189320755191 | 0.4486383999492835 |
| 0.0382143234583316 | 0.1198353118690710 | 0.9437328020282166 |
| 0.5401504040510521 | 0.1252330682225310 | 0.9164711179352144 |
| 0.0382515473828859 | 0.6218024225979750 | 0.9475693623502942 |
| 0.5396470611296205 | 0.6222266842335524 | 0.9485235083453977 |
| 0.1180698410898829 | 0.0078230422985970 | 0.2169643886817745 |
| 0.6157927606461220 | 0.0118278191670710 | 0.2203796910794654 |
| 0.1187584911603545 | 0.5117358251020798 | 0.2224781260092705 |
| 0.6163353995462327 | 0.5097710796537299 | 0.2226108366556842 |
| 0.1170956996631613 | 0.0096064385548904 | 0.7200724505319855 |
| 0.6143792896887116 | 0.0151030069201941 | 0.7295700308477647 |
| 0.1171918326998047 | 0.5107785165564738 | 0.7214543879288696 |
| 0.6176856092968591 | 0.5109266587786583 | 0.7229304539393031 |
| 0.3826179348119230 | 0.4894825087535125 | 0.2778645720266667 |
| 0.8831397496498506 | 0.4889256495712839 | 0.2787773481893900 |
| 0.3840061654786146 | 0.9900455833614442 | 0.2780935111522783 |
| 0.8827509731531210 | 0.9909868775448861 | 0.2779679818840974 |
| 0.3819123077501211 | 0.4908863682834788 | 0.7807325059296130 |
| 0.8821197083694496 | 0.4891479123451888 | 0.7783133253357516 |
| 0.3857240046087648 | 0.9935992375239243 | 0.7750099100266652 |
| 0.8822599220180827 | 0.9881785413755585 | 0.7774038872764349 |
| 0.3819938156565972 | 0.2619355031008111 | 0.0279736429600719 |
| 0.8841948803829237 | 0.2604811762281178 | 0.0295253316925468 |
| 0.3830181070257764 | 0.7600099248962897 | 0.0272421595589719 |
| 0.8826862091002387 | 0.7599324594218955 | 0.0287914367194236 |
| 0.3902379886138405 | 0.2561442302375459 | 0.5381110206160089 |
| 0.8810798923944068 | 0.2603850731671506 | 0.5286399096453626 |
| 0.3834236924672897 | 0.7598317988099044 | 0.5297194186552093 |
| 0.8827867762832086 | 0.7622230964127061 | 0.5277062730444214 |
| 0.1215117207146602 | 0.2463795638025433 | 0.4896134068794295 |
| 0.6132538004812812 | 0.2366902277826053 | 0.4753490379807558 |
| 0.1164136345836208 | 0.7424541658896732 | 0.4716373316732242 |



|                    |                    |                    |
|--------------------|--------------------|--------------------|
| 0.6170572611659356 | 0.7389332829877756 | 0.4719436865008107 |
| 0.1156175929429307 | 0.2380490491357361 | 0.9621186070207385 |
| 0.6183275901809373 | 0.2421961491457513 | 0.9663790437952436 |
| 0.1167383229216061 | 0.7391823431744753 | 0.9708494674412577 |
| 0.6183225608466928 | 0.7392866087355165 | 0.9718515548989517 |
| 0.1918486546969533 | 0.3241985840510394 | 0.4146941427269593 |
